# Supplementary material for: Removal of methylene blue dye by solvothermally reduced graphene oxide: a metal-free adsorption and photodegradation method
Source: Royal Society of Chemistry journal article supplement (doi:10.1039/c9ra05793e), 2019-01-01
Supplement: c9ra05793e1.pdf [file c9ra05793e1.pdf]

**Table S1.** Adsorption and photocatalytic degradation of MB dye by rGO.

| Synthesis Method                                    | Experimental conditions                                    | Performance                                              | Residual [MB] (ppm) | Ref.      |
|-----------------------------------------------------|------------------------------------------------------------|----------------------------------------------------------|---------------------|-----------|
| Chemical reduction with hydrazine                   | rGO: 1 mg<br>[MB]: 1.3 ppm<br>Light: 100 W Hg lamp         | 10% adsorbed and degraded at the same time in 90 min     | 1.2                 | 1         |
| Electrochemical exfoliation from graphite electrode | rGO: 60 mg<br>[MB]: 350 ppm<br>Light: 15 W UV lamp         | 40% degraded in 90 min after adsorption in 4 hr          | N/A                 | 2         |
| Chemical reduction with hydrazine                   | rGO: 50 mg<br>[MB]: 15000 ppm<br>Light: 100 W UV lamp      | 7% degraded in 100 min after adsorption of 12% in 20 min | 12276               | 3         |
| Chemical reduction with hydrazine                   | rGO: 20 mg<br>[MB]: 3.2 ppm<br>Light: Sunlight             | 8% degraded in 180 min after adsorption of 50% in 60 min | 1.5                 | 4         |
| Microwave irradiation                               | rGO: 10 mg<br>[MB]: 10 ppm<br>Light: 250 W Hg lamp         | 19% degraded in 150 min after adsorption of 1% in 30 min | 8                   | 5         |
| Photochemical reduction                             | rGO: 10 mg<br>[MB]: 10 ppm<br>Light: UV lamp               | 35% adsorbed and degraded at the same time in 120 min    | 6.5                 | 6         |
| Photochemical reduction                             | rGO: 10 mg<br>[MB]: 10 ppm<br>Light: 300 W Xe lamp         | 30% adsorbed and degraded at the same time in 120 min    | 7                   | 6         |
| Green reduction without toxic reductant             | rGO: 60 mg<br>[MB]: 50 ppm<br>Light: 95 W UV lamp<br>(x 2) | 99% degraded in 6 hr after adsorption of 87% in 4 hr     | 0.1                 | This work |

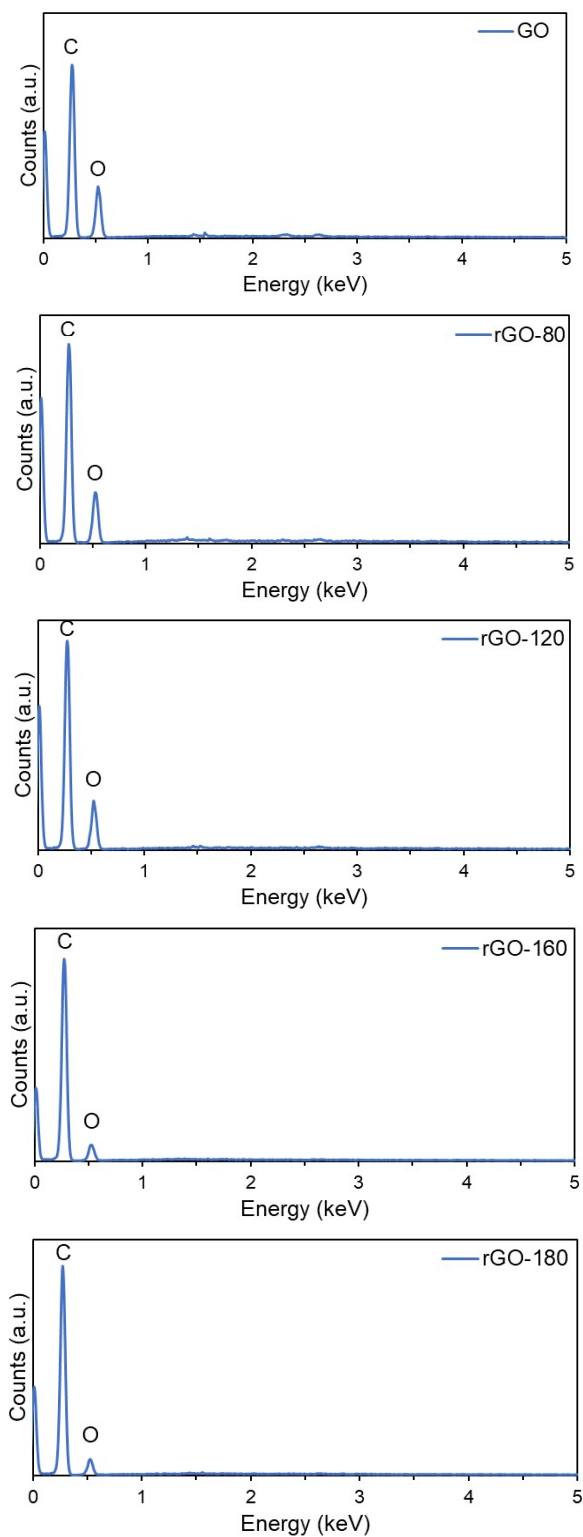

**Fig. S1** EDX elemental analysis of GO, rGO-80, rGO-120, rGO-160 and rGO-180.

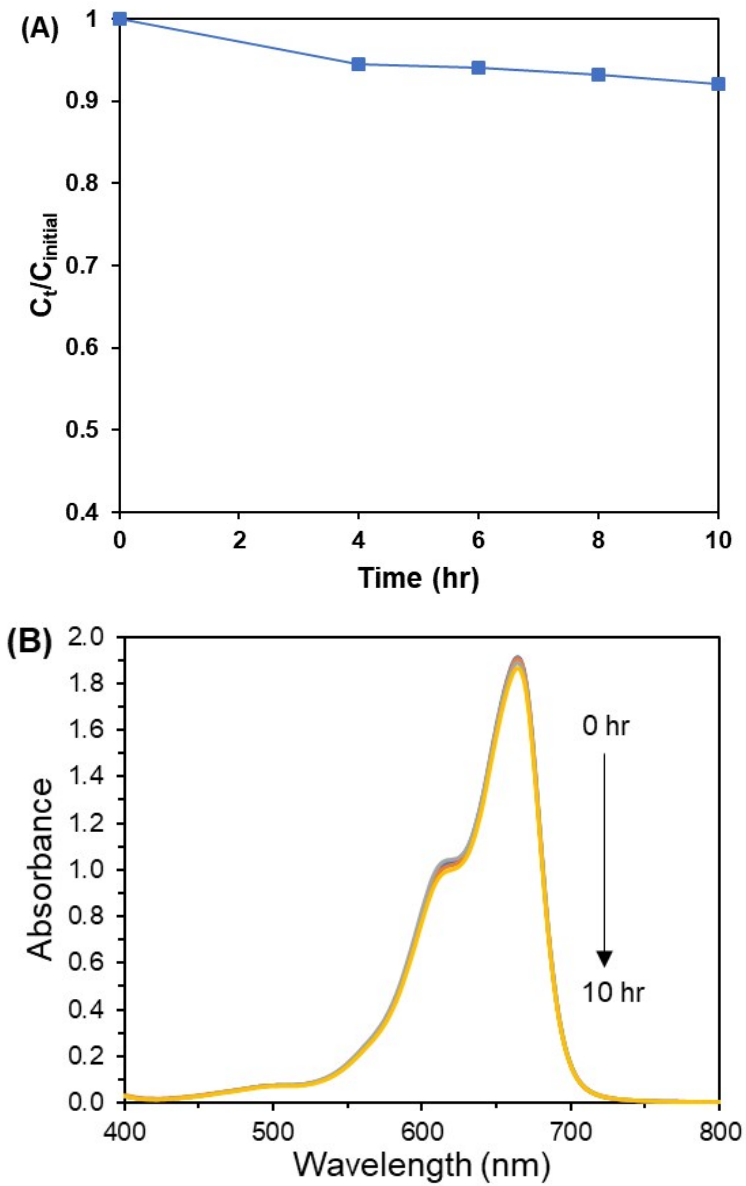

**Fig. S2 (A)** Removal of MB dye in the absence of photocatalyst **(B)** Time-dependent UV-Vis absorption spectra of MB dye in the absence of photocatalyst ( $[MB] = 50$  ppm; light intensity =  $60 \text{ W}\cdot\text{m}^{-2}$ ; pH = 6).

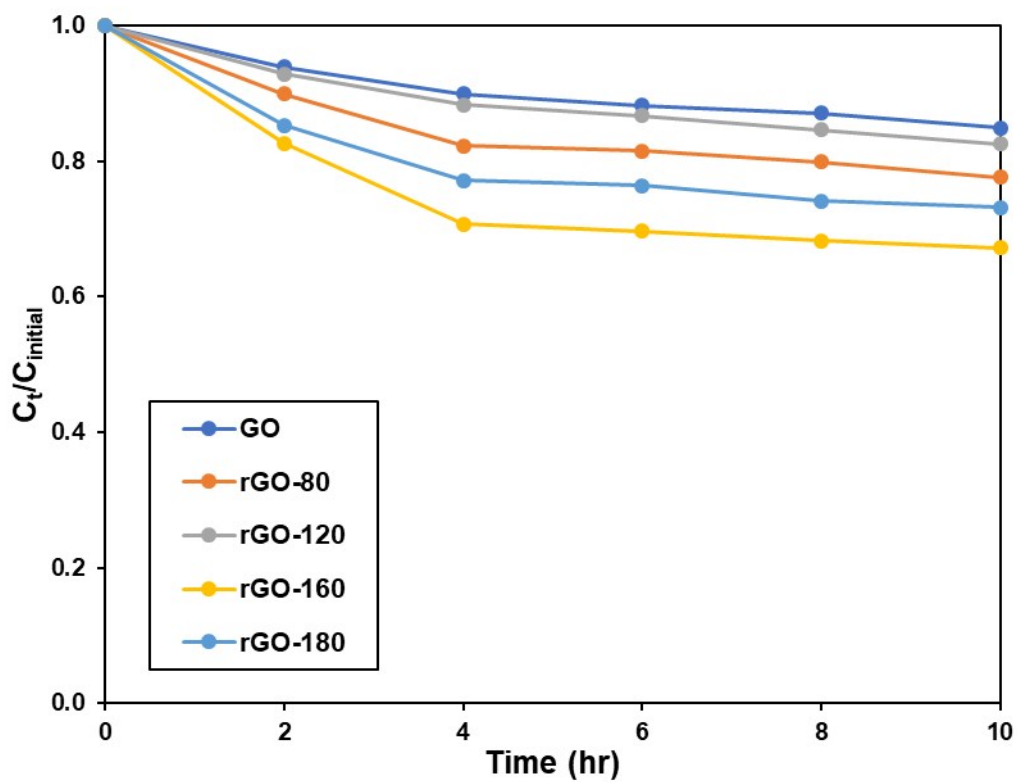

**Fig. S3** Dark adsorption of MB dye by GO, rGO-80, rGO-120, rGO-160 and rGO-180 (catalyst loading = 20 mg; [MB] = 50 ppm; light intensity =  $60 \text{ W}\cdot\text{m}^{-2}$ ; pH = 6).

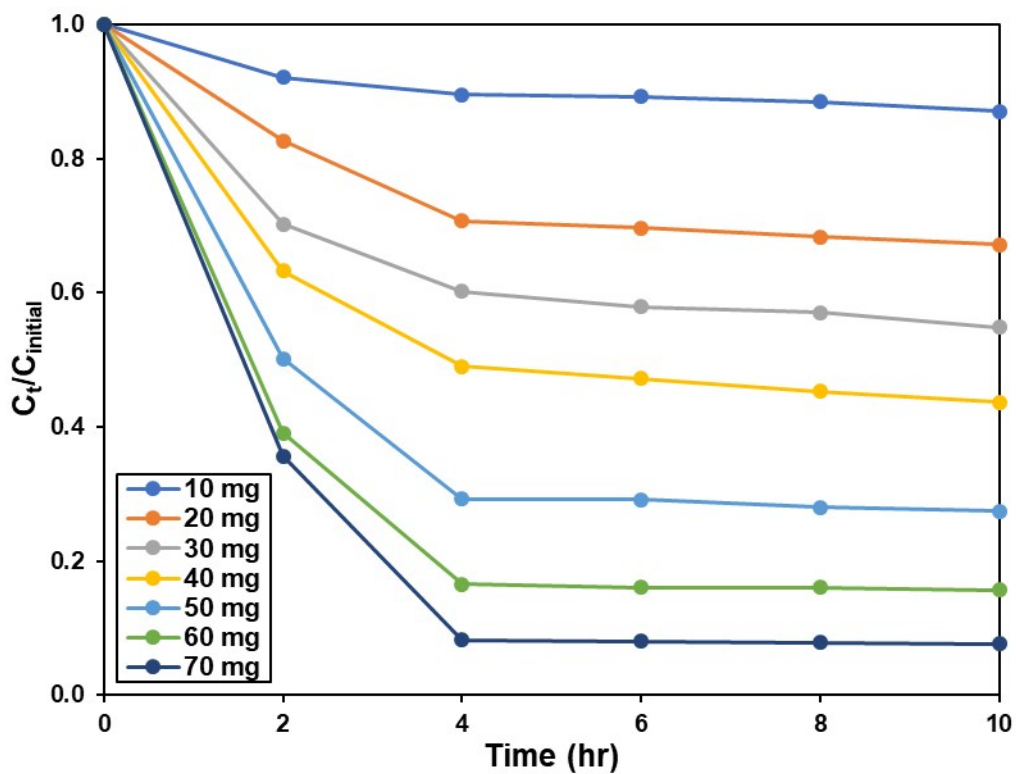

**Fig. S4** Dark adsorption of MB dye by 10 mg, 20 mg, 30 mg, 40 mg, 50 mg, 60 mg and 70 mg of rGO-160 ([MB] = 50 ppm; light intensity =  $60 \text{ W}\cdot\text{m}^{-2}$ ; pH = 6).

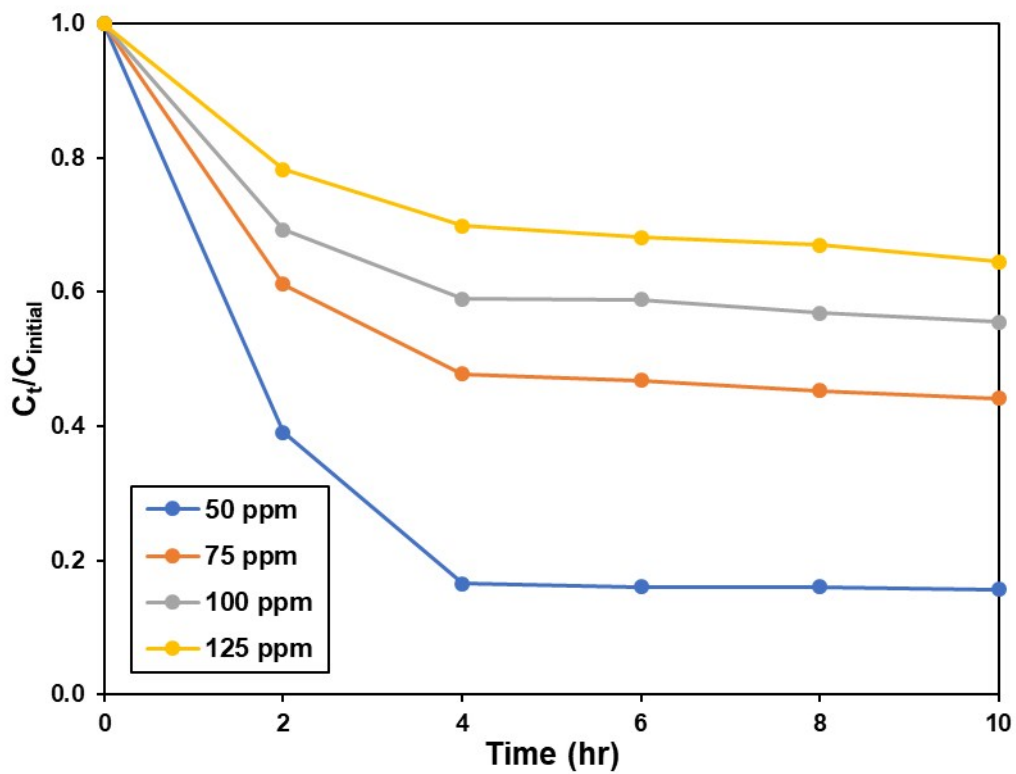

**Fig. S5** Dark adsorption of MB dye by rGO-160 in 50 ppm, 75 ppm, 100 ppm and 125 ppm of MB solution (catalyst loading = 60 mg; light intensity = 60 W·m<sup>-2</sup>; pH = 6).

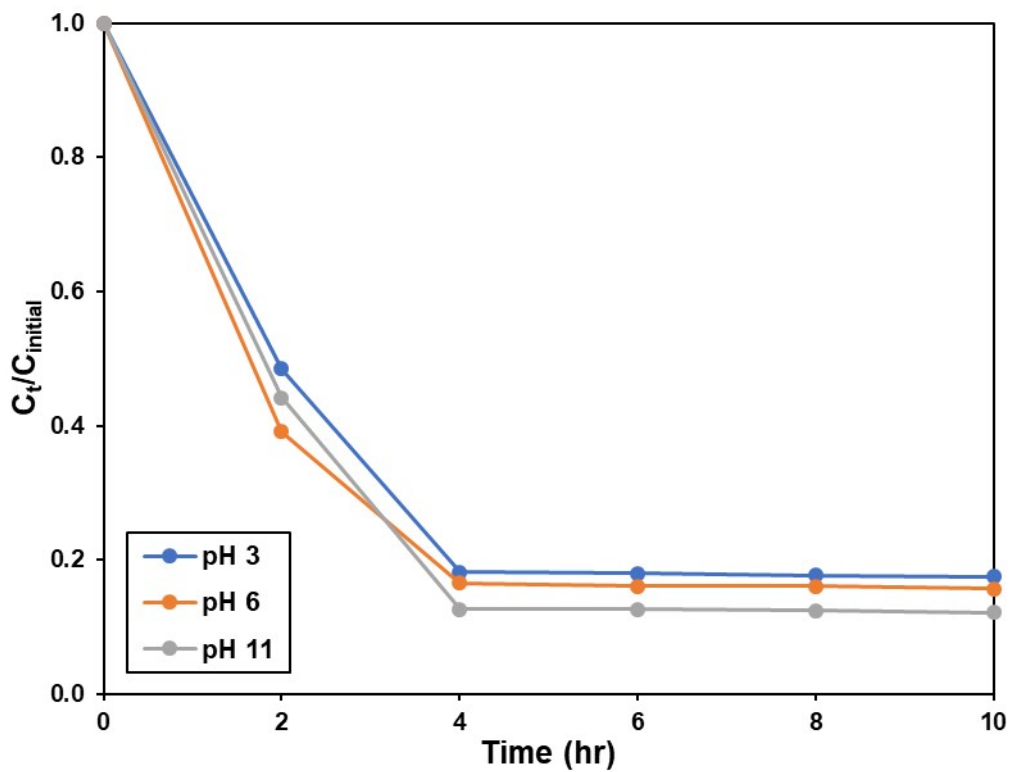

**Fig. S6** Dark adsorption of MB dye by rGO-160 at pH 3, 6 and 11 of MB solution (catalyst loading = 60 mg; [MB] = 50 ppm; light intensity =  $60 \text{ W}\cdot\text{m}^{-2}$ ).

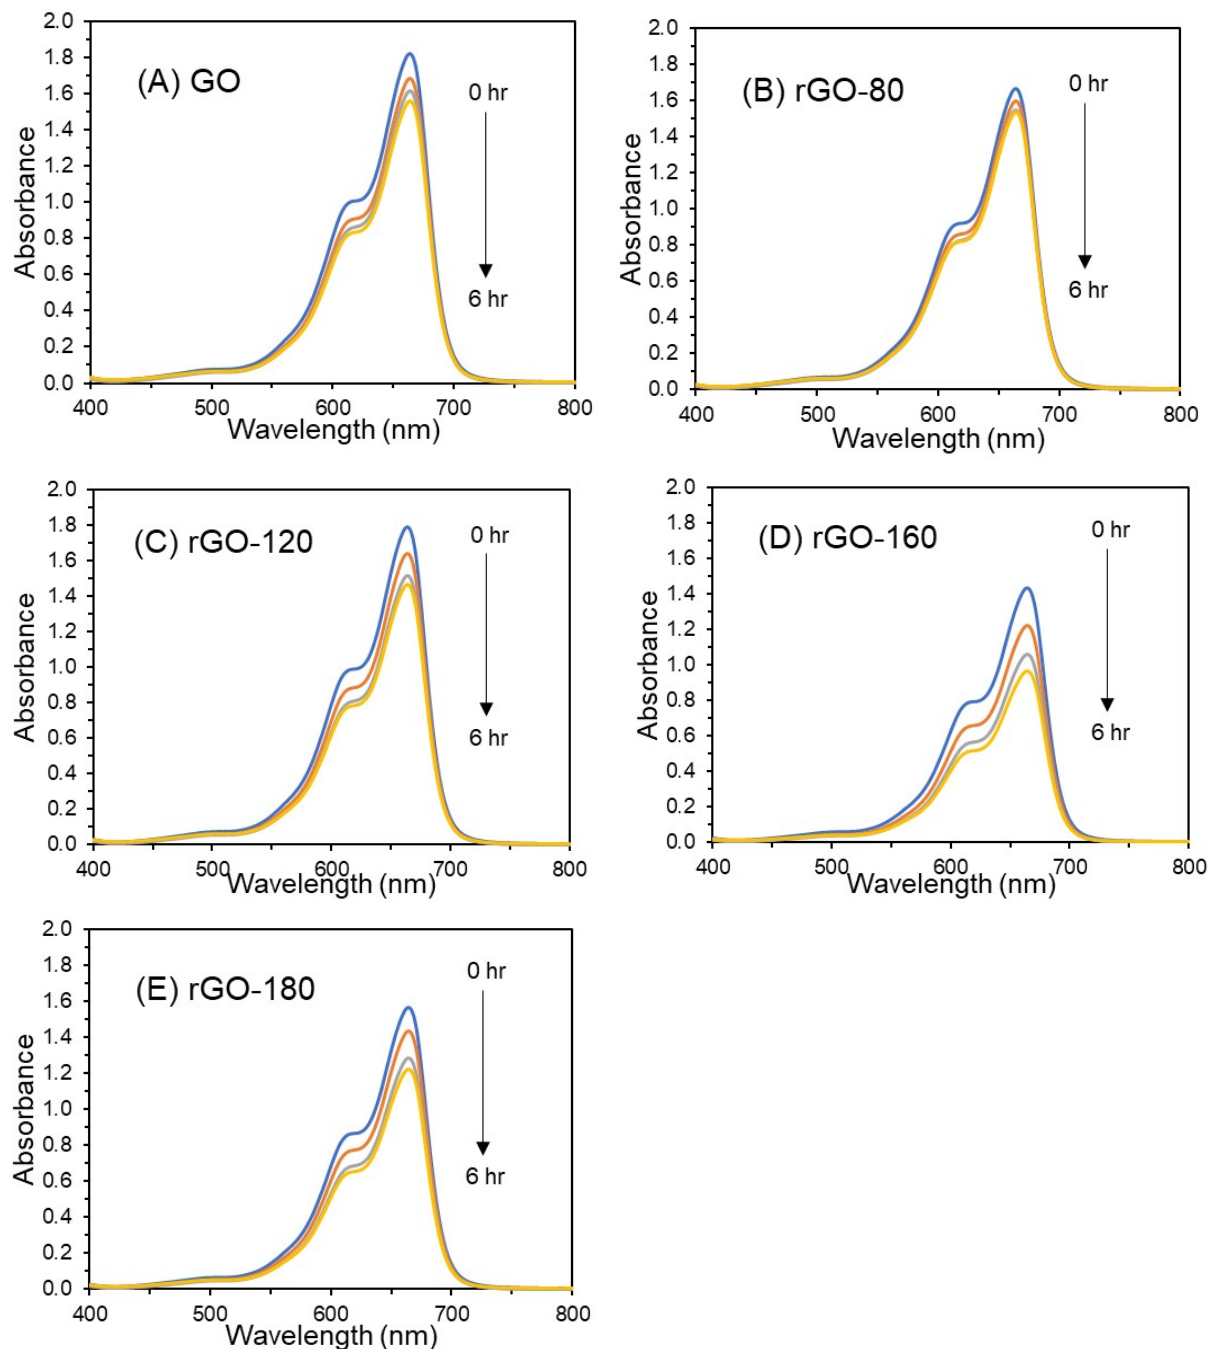

**Fig. S7** Time-dependent UV-Vis absorption spectra for the photocatalytic degradation of MB dye from time,  $t=0$  to  $t=6$ , by different photocatalysts, where (A) GO, (B) rGO-80, (C) rGO-120, (D) rGO-160, and (E) rGO-180. (catalyst loading = 20 mg; [MB] = 50 ppm; light intensity =  $60 \text{ W}\cdot\text{m}^{-2}$ ; pH = 6).



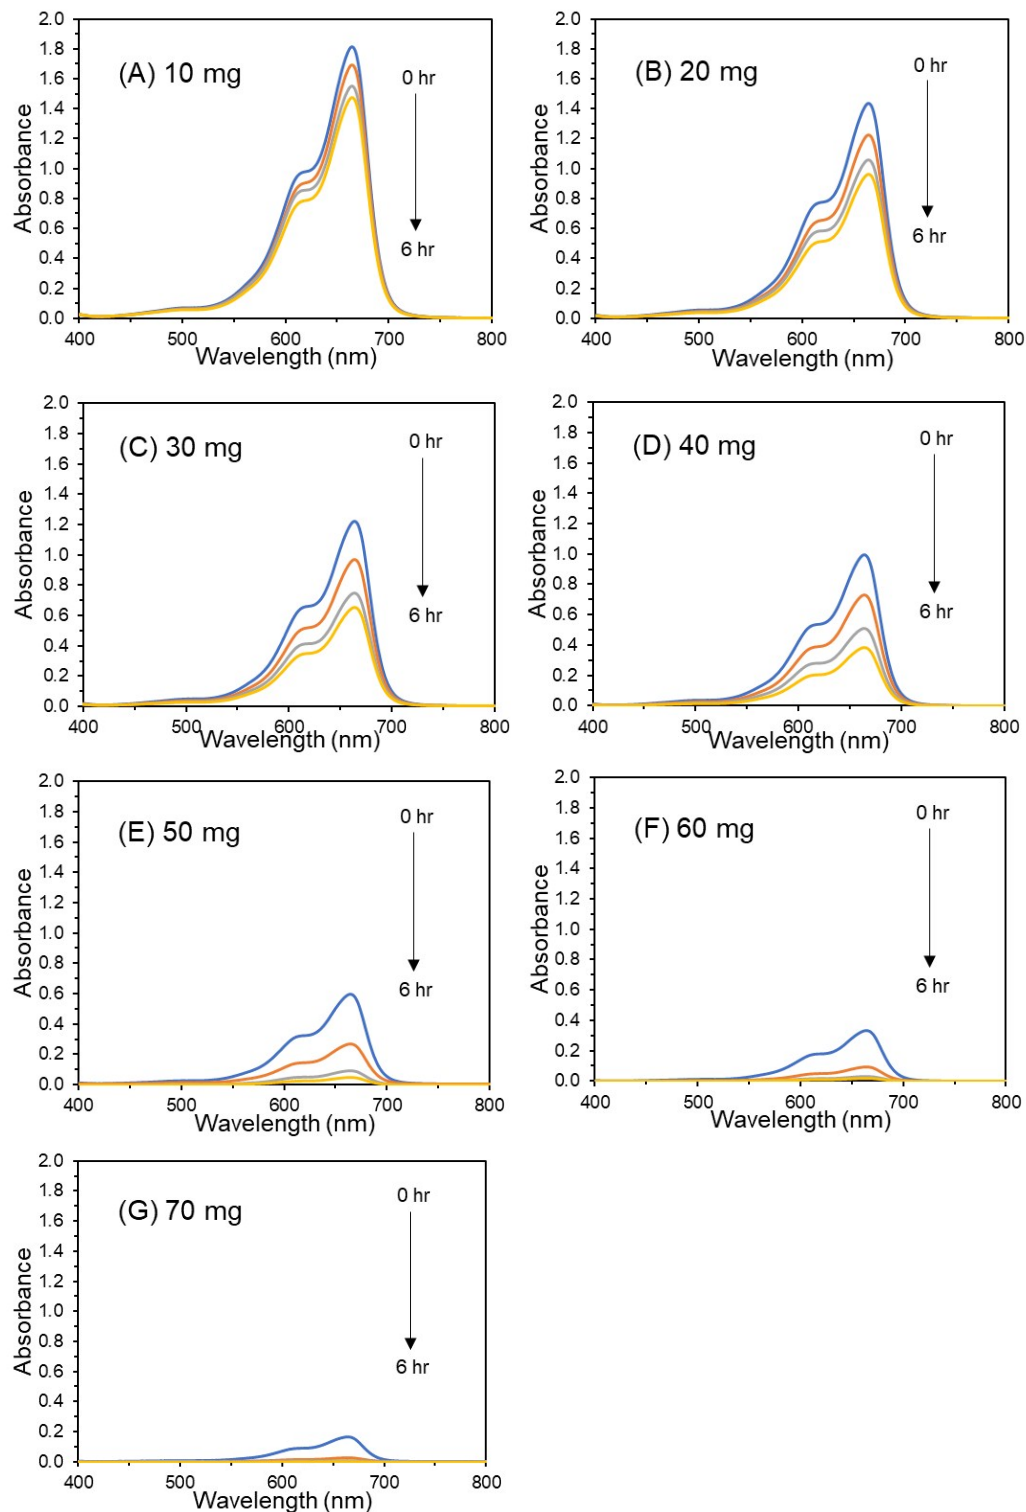

**Fig. S8** Time-dependent UV-Vis absorption spectra for the photocatalytic degradation of MB dye from time,  $t = 0$  to  $t = 6$ , by rGO-160 with different catalyst loading, where (A) 10 mg, (B) 20 mg, (C) 30 mg, (D) 40 mg, (E) 50 mg, (F) 60 mg, and (G) 70 mg. ( $[MB] = 50$  ppm; light intensity =  $60 \text{ W} \cdot \text{m}^{-2}$ ; pH = 6).

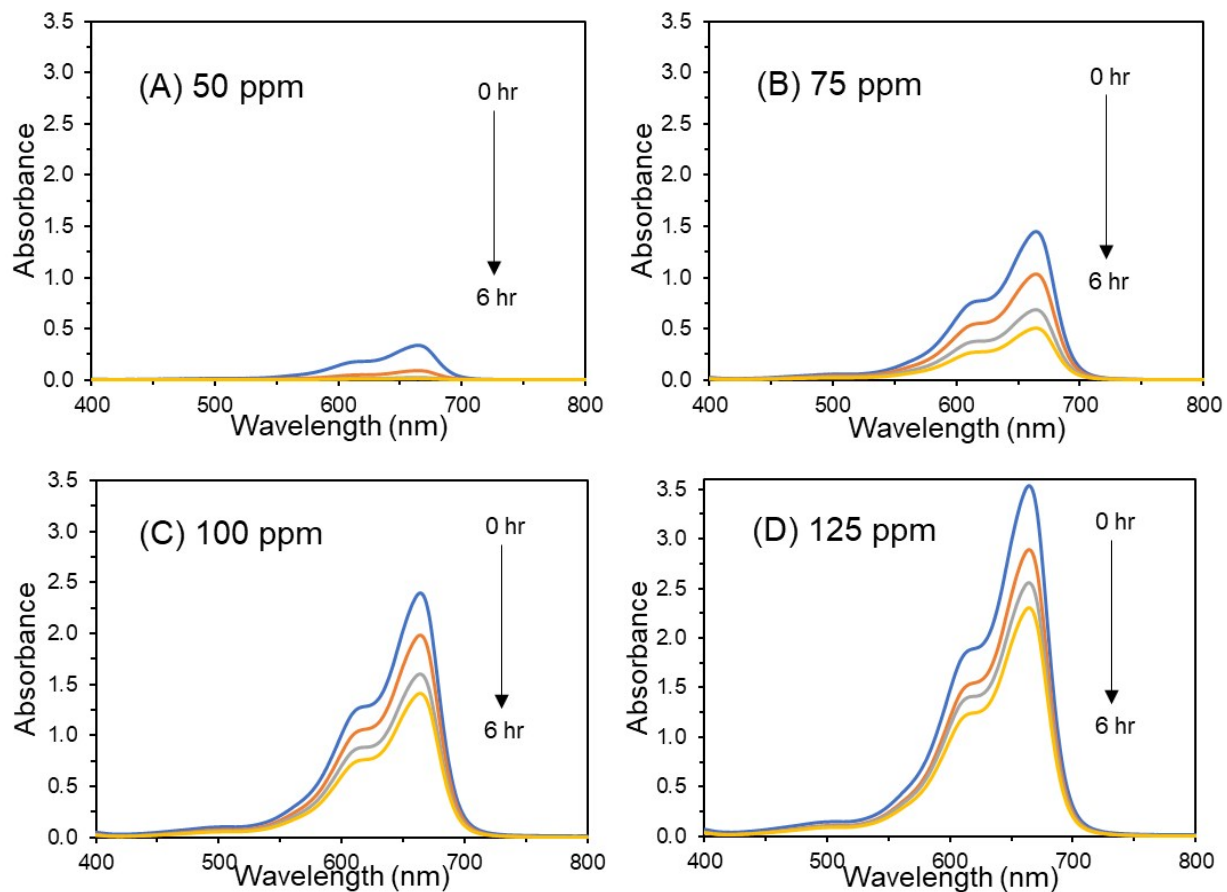

**Fig. S9** Time-dependent UV-Vis absorption spectra for the photocatalytic degradation of MB dye from time,  $t=0$  to  $t=6$ , by rGO-160 with different initial MB concentration, where (A) 50 ppm, (B) 75 ppm, (C) 100 ppm, and (D) 125 ppm. (catalyst loading = 60 mg; light intensity =  $60 \text{ W}\cdot\text{m}^{-2}$ ; pH = 6).

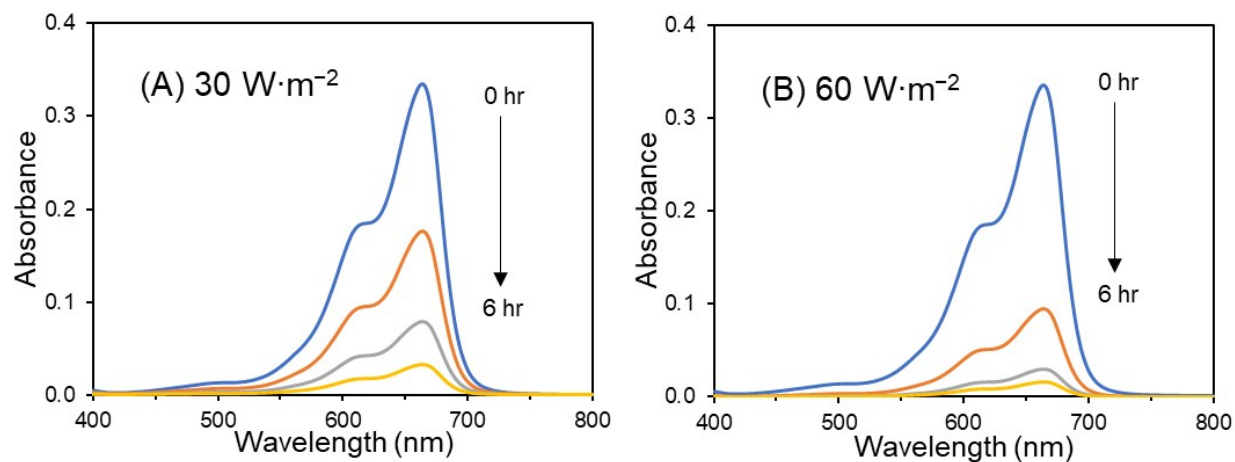

**Fig. S10** Time-dependent UV-Vis absorption spectra for the photocatalytic degradation of MB dye from time,  $t=0$  to  $t=6$ , by rGO-160 with different light intensity, where (A)  $30 \text{ W}\cdot\text{m}^{-2}$  and (B)  $60 \text{ W}\cdot\text{m}^{-2}$  (catalyst loading = 60 mg; [MB] = 50 ppm; pH = 6).

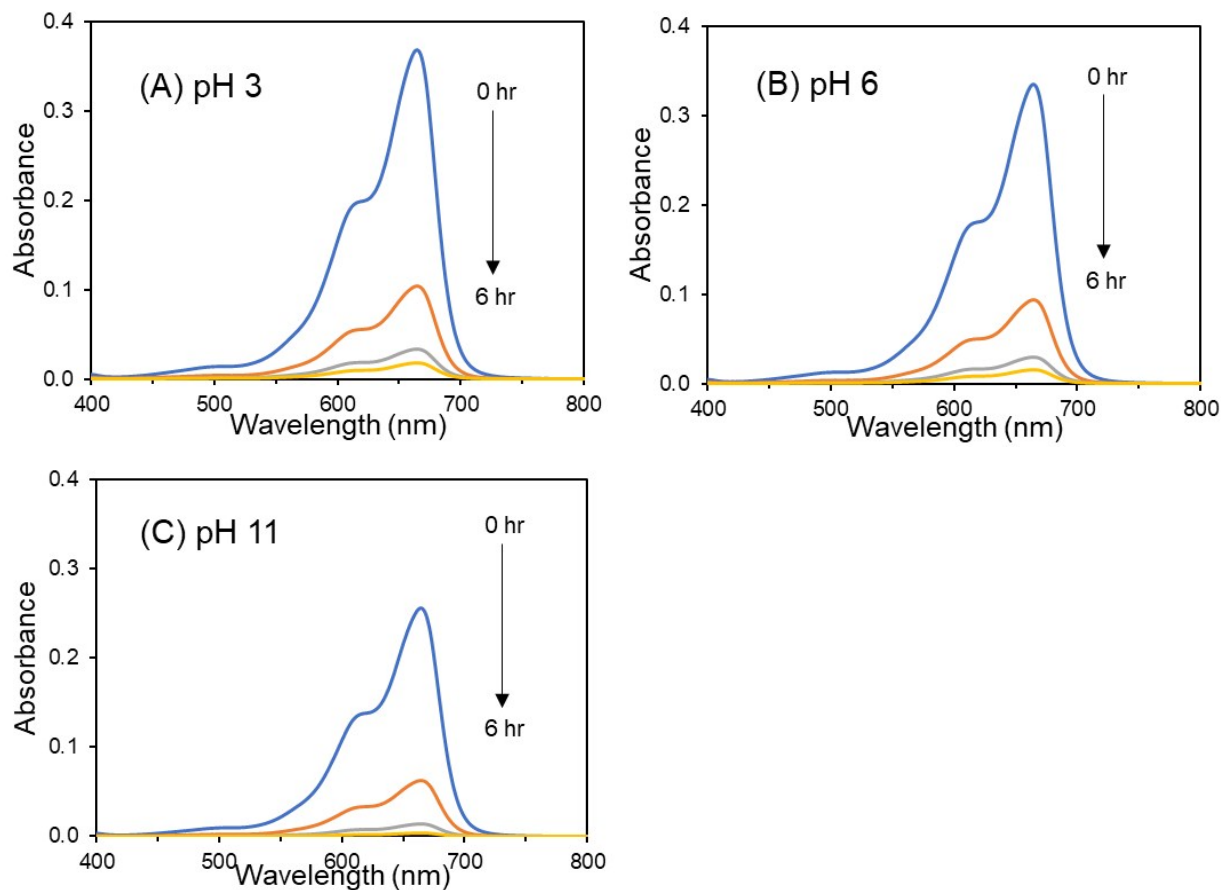

**Fig. S11** Time-dependent UV-Vis absorption spectra for the photocatalytic degradation of MB dye from time,  $t=0$  to  $t=6$ , by rGO-160 at different pH, where (A) pH 3, (B) pH 6, and (C) pH 11 (catalyst loading = 60 mg; [MB] = 50 ppm; light intensity =  $60 \text{ W}\cdot\text{m}^{-2}$ ).

## References

1. S. Chandra, P. Das, S. Bag, R. Bhar and P. Pramanik, *Mater. Sci. Eng. B*, 2012, **177**, 855-861.
2. Y. Zhao, X. Wei, Y. Wang and F. Luo, *Chem. Phys. Lett.*, 2014, **607**, 34-38.
3. S. Xu, L. Fu, T. S. H. Pham, A. Yu, F. Han and L. Chen, *Ceram. Int.*, 2015, **41**, 4007-4013.
4. J. Kaur, K. Anand, R. Thangaraj and R. Singh, *Indian J. Phys.*, 2016, **90**, 1183-1194.
5. M. J. S. Mohamed and D. K. Bhat, *AIMS Mater. Sci.*, 2017, **4**, 158-171.
6. B. Xue and Y. Zou, *J. Colloid Interface Sci.*, 2018, **529**, 306-313.
